# Supplementary material
Source: PubMed Central journal article supplement (PMC10979757)

# Blood loss (ml)

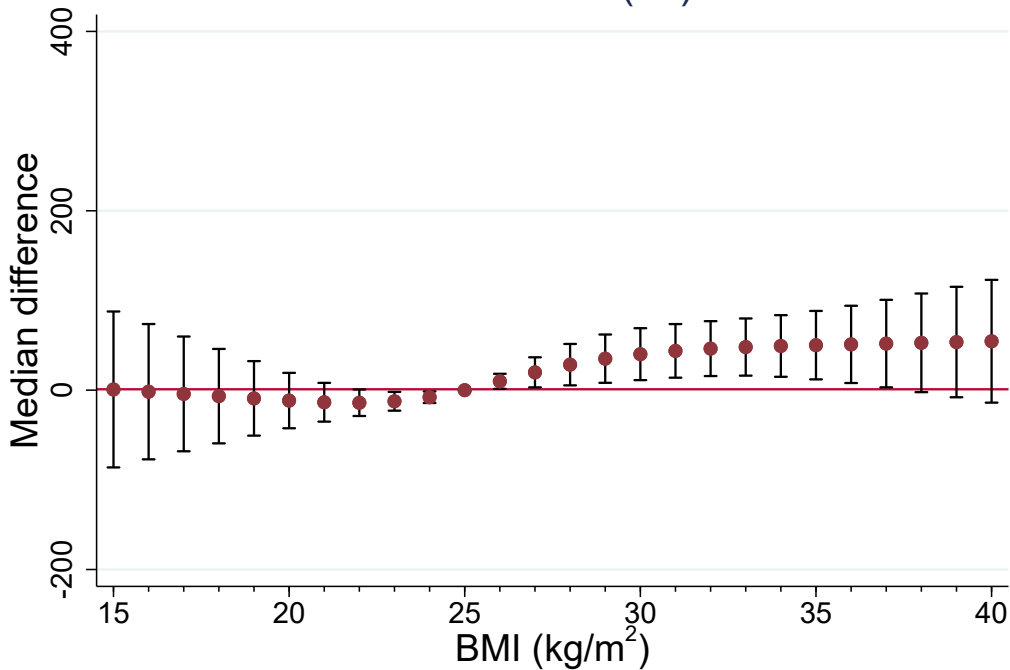

Supplement: NIHMS1900860-supplement-1.pdf [file NIHMS1900860-supplement-1.pdf]

# Intraoperative transfusion

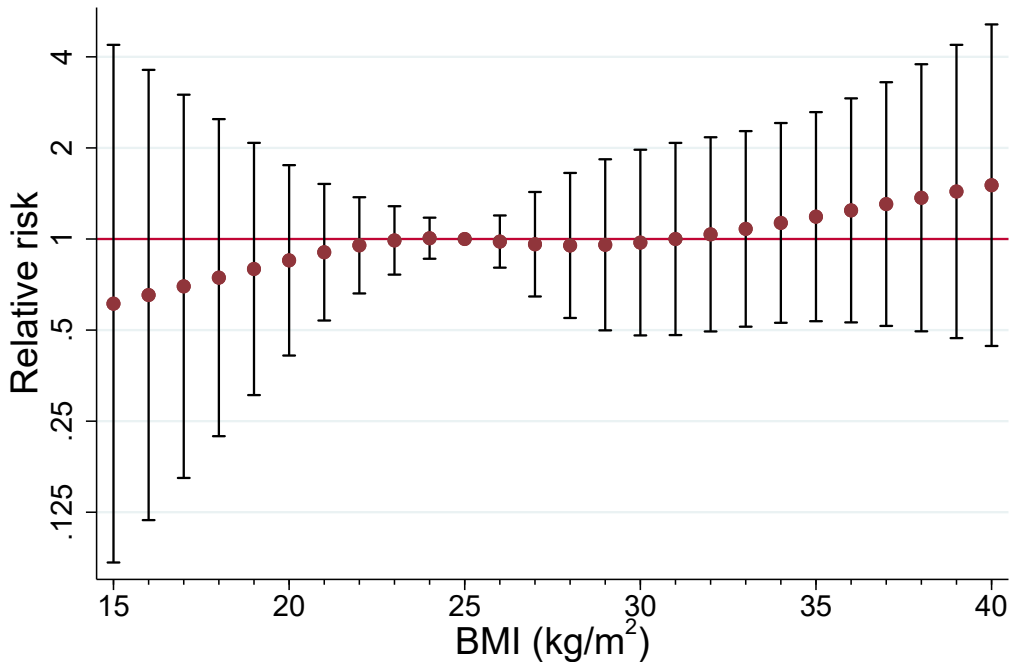

Supplement: NIHMS1900860-supplement-10.pdf [file NIHMS1900860-supplement-10.pdf]

# Intraoperative transfusion

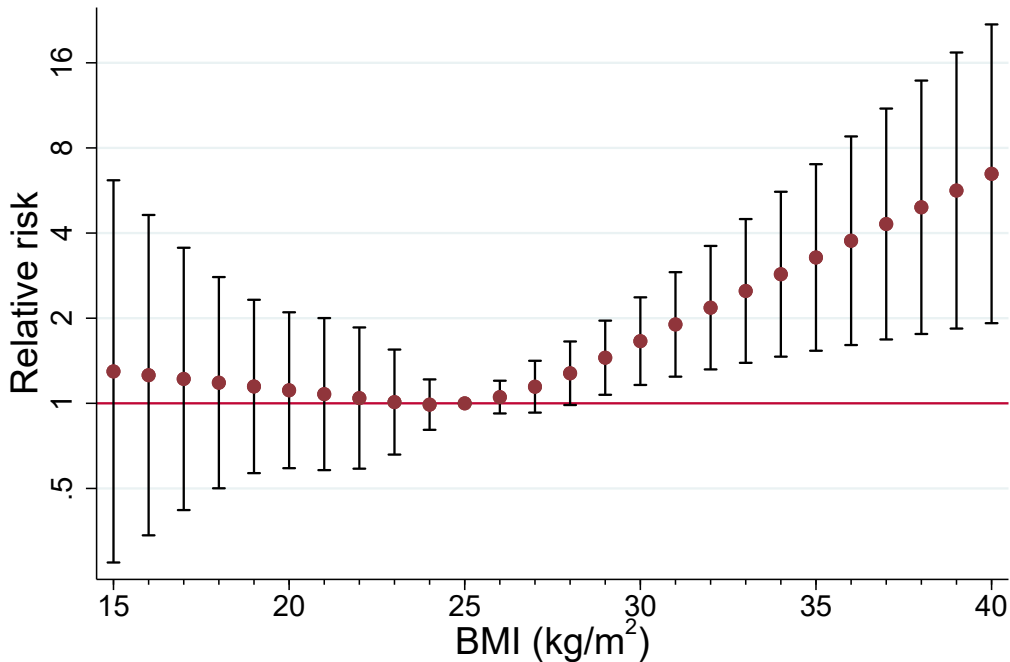

Supplement: NIHMS1900860-supplement-11.pdf [file NIHMS1900860-supplement-11.pdf]

# Blood loss (ml)

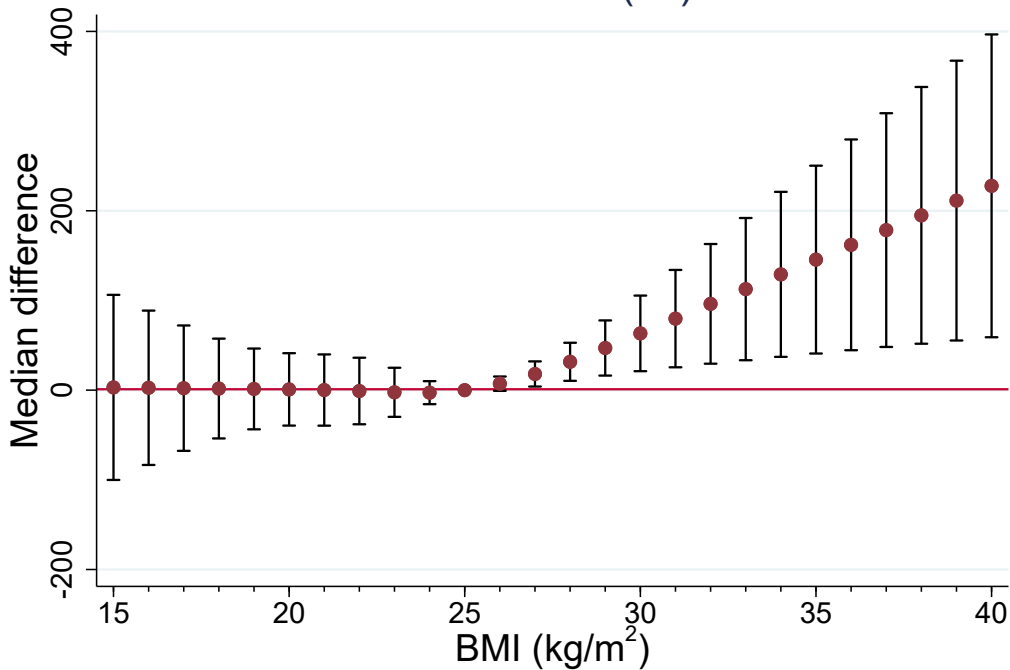

Supplement: NIHMS1900860-supplement-2.pdf [file NIHMS1900860-supplement-2.pdf]

# Postoperative hospital stay (days)

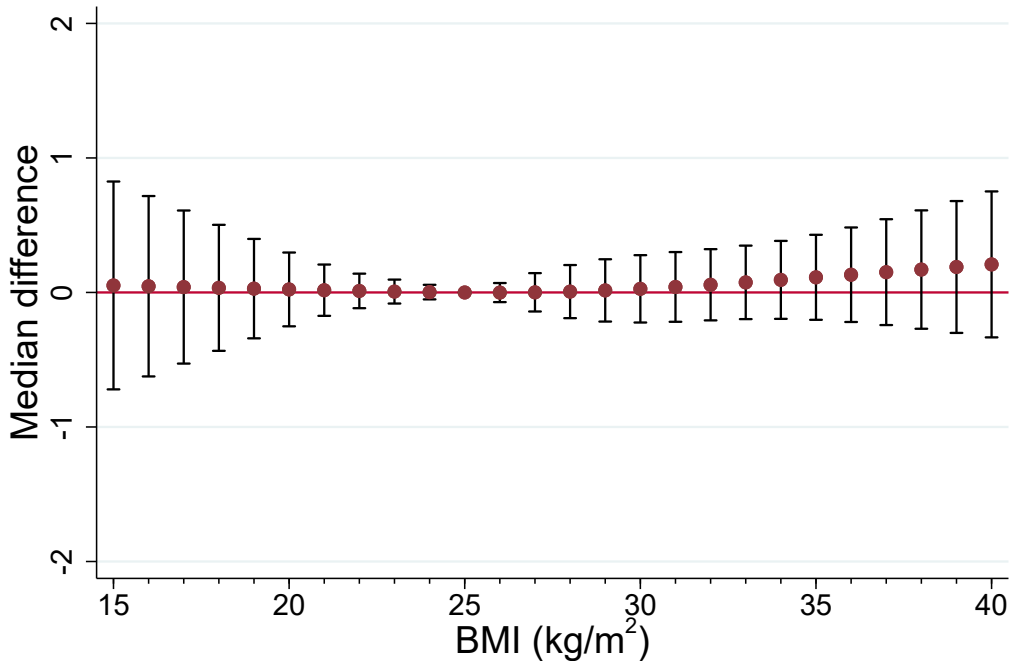

Supplement: NIHMS1900860-supplement-3.pdf [file NIHMS1900860-supplement-3.pdf]

# Postoperative hospital stay (days)

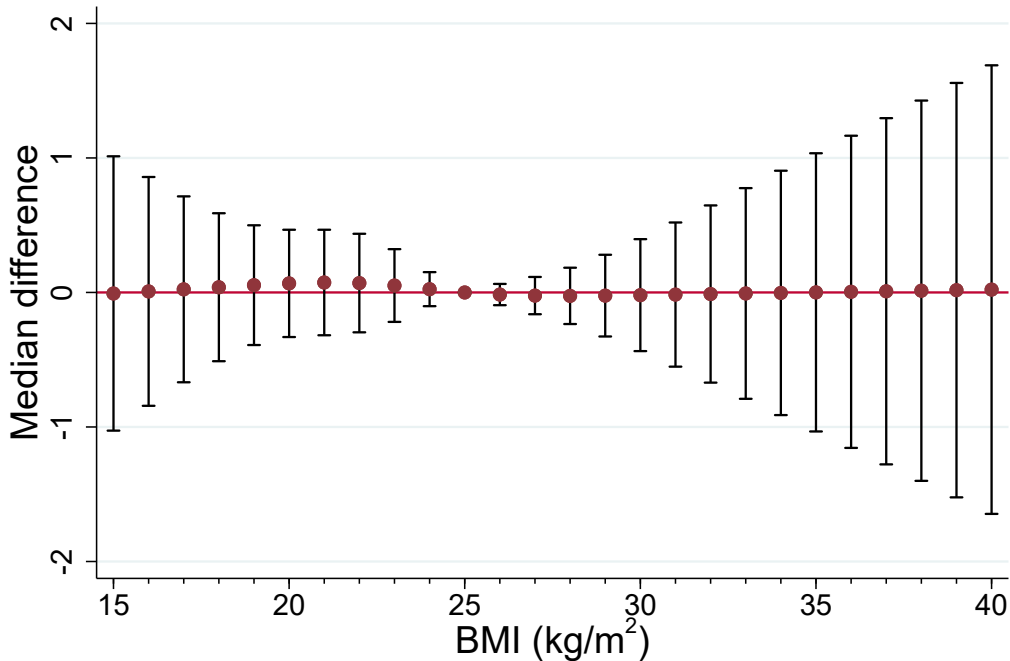

Supplement: NIHMS1900860-supplement-4.pdf [file NIHMS1900860-supplement-4.pdf]

OT time (min)

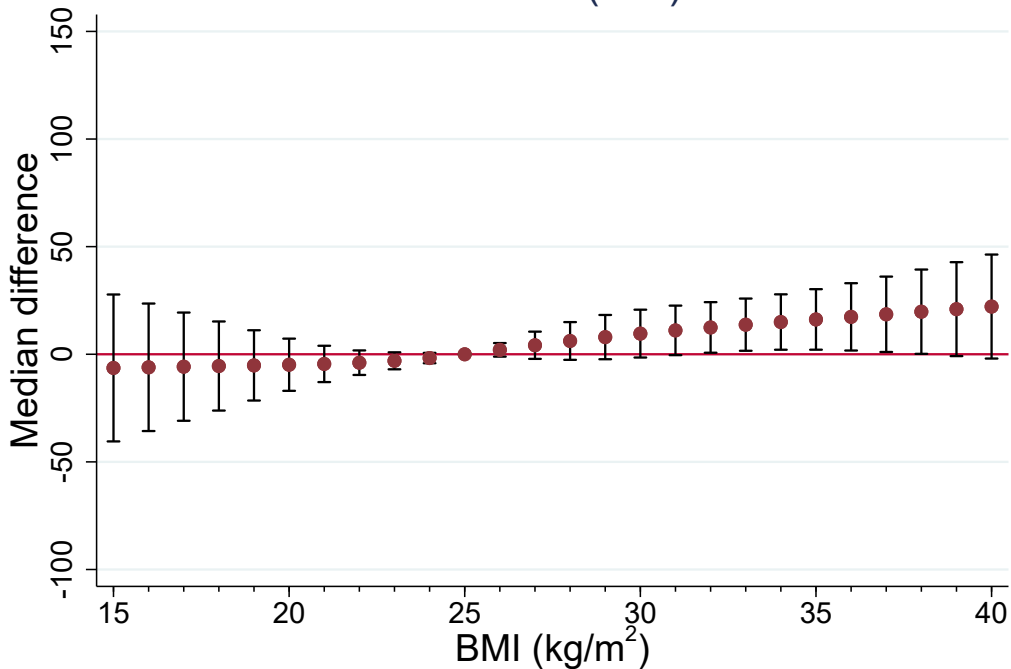

Supplement: NIHMS1900860-supplement-5.pdf [file NIHMS1900860-supplement-5.pdf]

OT time (min)

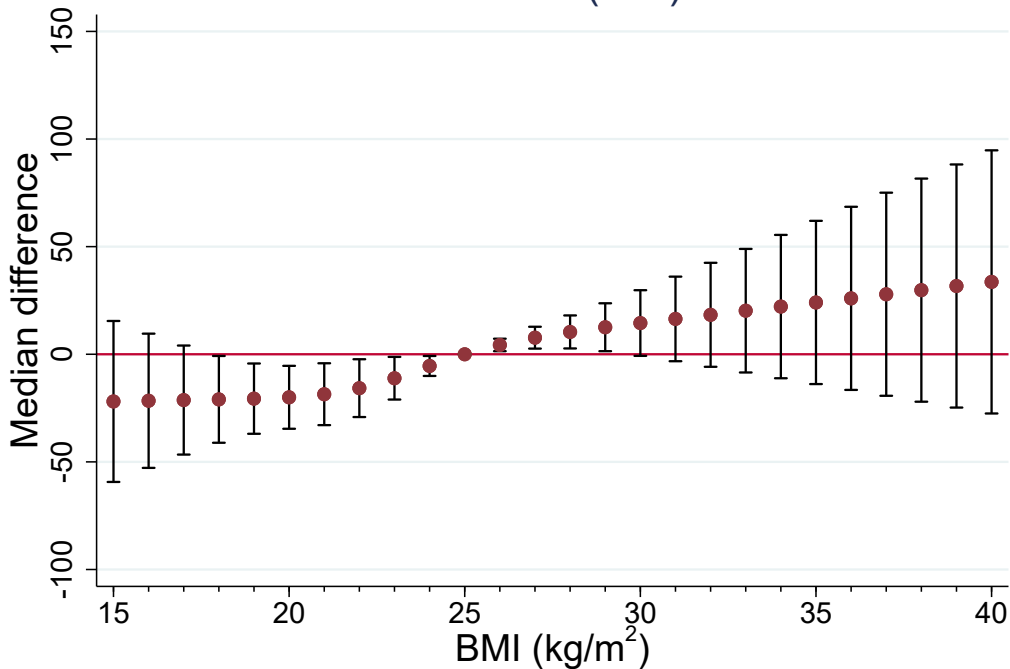

Supplement: NIHMS1900860-supplement-6.pdf [file NIHMS1900860-supplement-6.pdf]

# Open conversion

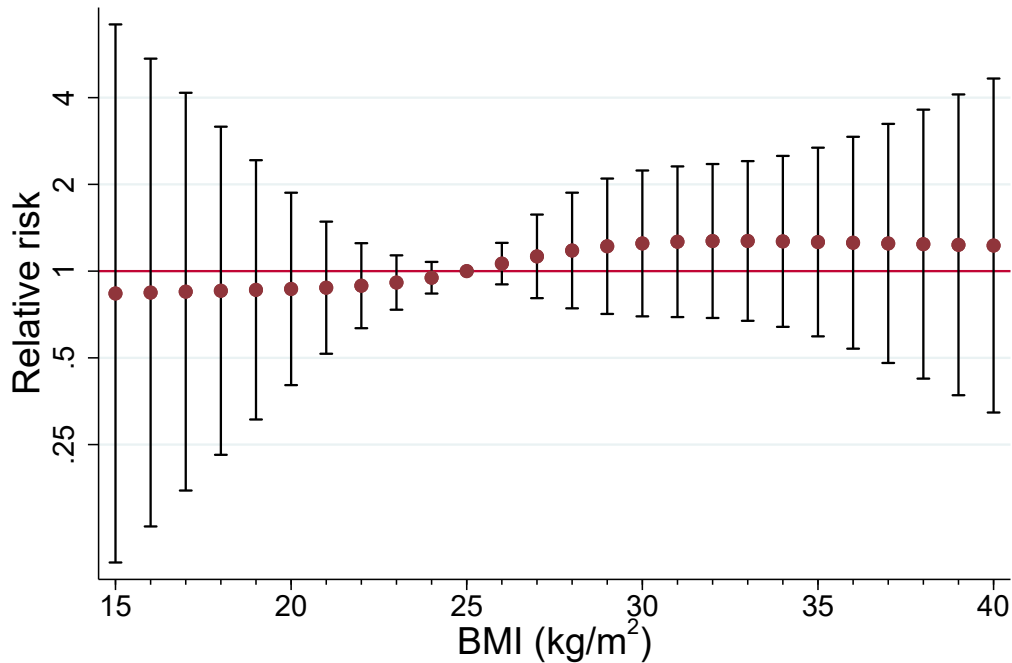

Supplement: NIHMS1900860-supplement-7.pdf [file NIHMS1900860-supplement-7.pdf]

# Postoperative morbidity

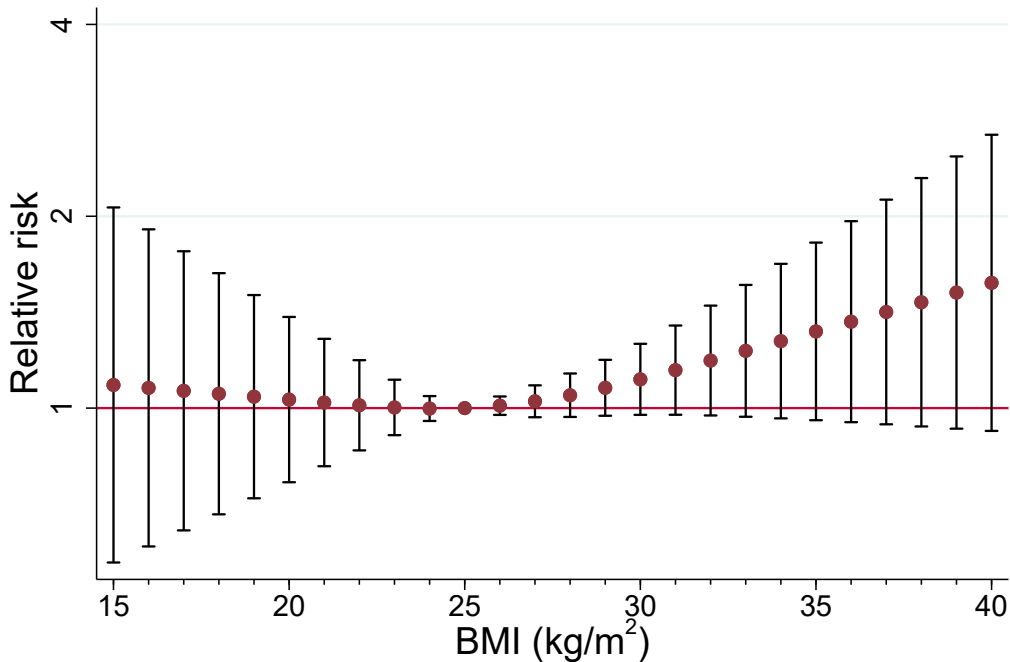

Supplement: NIHMS1900860-supplement-8.pdf [file NIHMS1900860-supplement-8.pdf]

# Postoperative morbidity

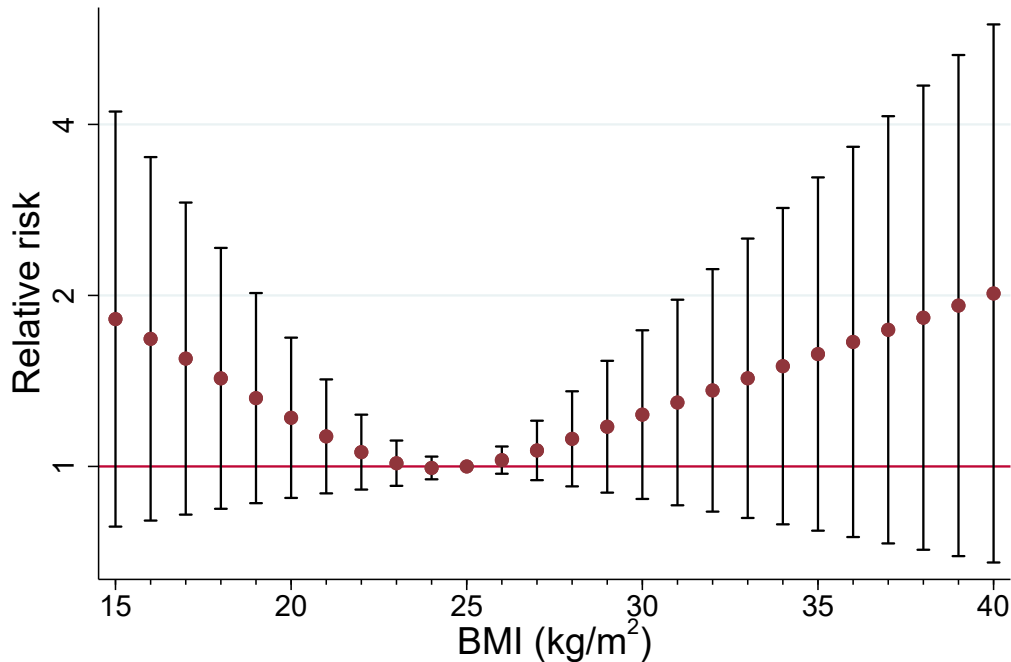

Supplement: NIHMS1900860-supplement-9.pdf [file NIHMS1900860-supplement-9.pdf]
